# Supplementary material for: Tumor-targeted Chlorotoxin-coupled Nanoparticles for Nucleic Acid Delivery to Glioblastoma Cells: A Promising System for Glioblastoma Treatment
Source: PubMed Central journal article supplement — Mol Ther Nucleic Acids. 2013 Jun 18;2(6):e100–. doi: 10.1038/mtna.2013.30 (PMC3696908; doi:10.1038/mtna.2013.30), 2013-06-18
Supplement: mtna201330x1.pdf [file mtna201330x1.pdf]

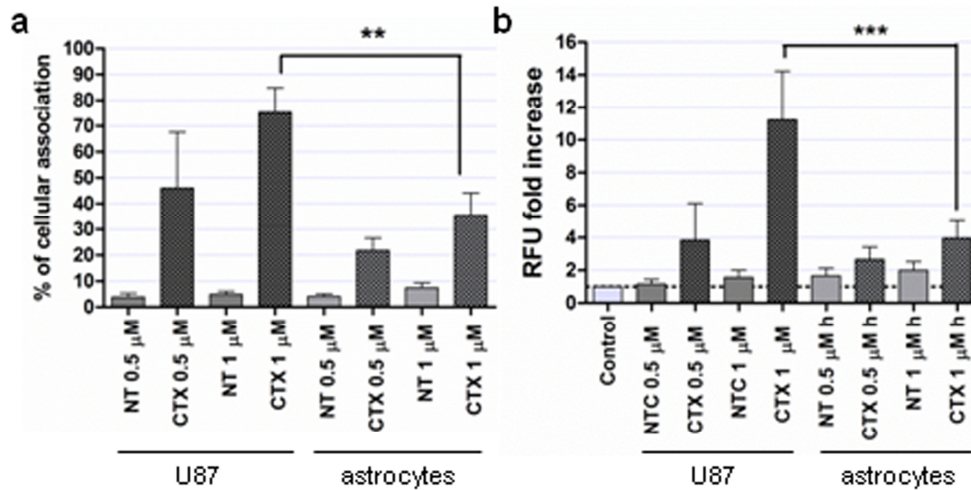

**Supplementary Figure 1. Association of SNALPs with U87 GBM cells and mouse primary astrocytes.** Cells were incubated, for 4 hours at 37°C, with CTX-coupled (CTX) or nontargeted (NT) liposomes encapsulating FAM-labeled anti-miR-21 oligonucleotides. After incubation, cells were rinsed with PBS and prepared for flow cytometry analysis, as described in Materials and Methods. The extent of cellular association was assessed only in viable cells, these being gated on the basis of morphological features (including cell volume and complexity). **(a)** Cellular association and **(b)** fluorescence intensity plots of cells incubated with 0.5 or 1  $\mu\text{M}$  of SNALP-formulated anti-miR-21 oligonucleotides. The percentage of cellular association in a was normalized to control cells (untreated). Relative fluorescence units (RFU) to control cells (untreated) are indicated in b. Values are presented as means  $\pm$  standard deviation (n=2). \*\* p<0.01, \*\*\* p<0.001 compared to U87 cells incubated with a similar amount of CTX-coupled liposomes encapsulating anti-miR-21 oligonucleotides.
