# Supplementary material for: Tumor-targeted Chlorotoxin-coupled Nanoparticles for Nucleic Acid Delivery to Glioblastoma Cells: A Promising System for Glioblastoma Treatment
Source: PubMed Central journal article supplement — Mol Ther Nucleic Acids. 2013 Jun 18;2(6):e100–. doi: 10.1038/mtna.2013.30 (PMC3696908; doi:10.1038/mtna.2013.30), 2013-06-18
Supplement: mtna201330x2.pdf [file mtna201330x2.pdf]

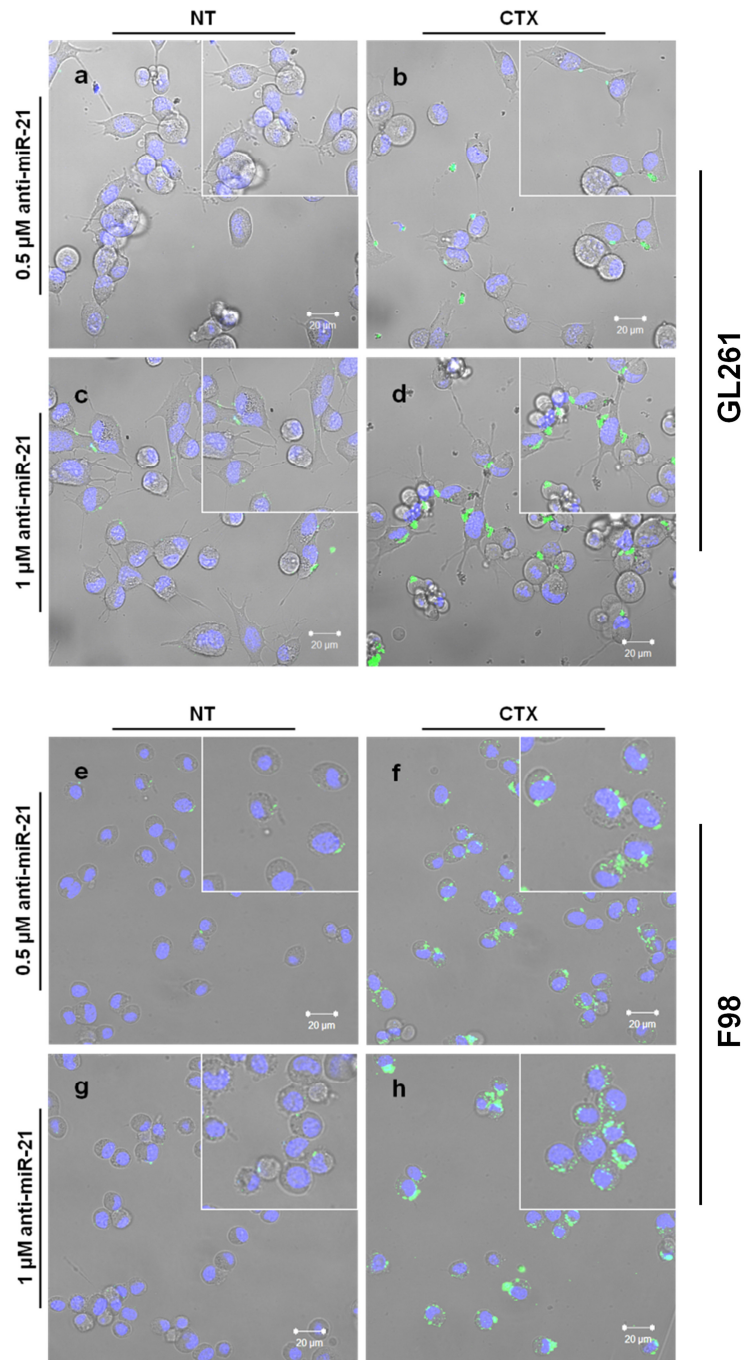

**Supplementary Figure 2. Internalization of SNALPs in GL261 mouse and F98 rat glioma cells.** Cells were incubated, for 4 hours at 37°C, with CTX-coupled (CTX) or nontargeted (NT) liposomes encapsulating FAM-labeled anti-miR-21 oligonucleotides. After incubation, cells were rinsed twice with PBS, stained with DNA-specific Hoechst 33342 (blue) and then observed by confocal microscopy. The panel shows representative images at 40× magnification of (a, b, c, d) GL261 or (e, f, g, h) F98 cells incubated with SNALP-formulated oligonucleotides at a final oligonucleotide concentration of (a, b, e, f) 0.5 or (c, d, g, h) 1 μM. Results are representative of two independent experiments. Scale corresponds to 20 μm.
