# Supplementary material for: Tumor-targeted Chlorotoxin-coupled Nanoparticles for Nucleic Acid Delivery to Glioblastoma Cells: A Promising System for Glioblastoma Treatment
Source: PubMed Central journal article supplement — Mol Ther Nucleic Acids. 2013 Jun 18;2(6):e100–. doi: 10.1038/mtna.2013.30 (PMC3696908; doi:10.1038/mtna.2013.30), 2013-06-18
Supplement: mtna201330x3.pdf [file mtna201330x3.pdf]

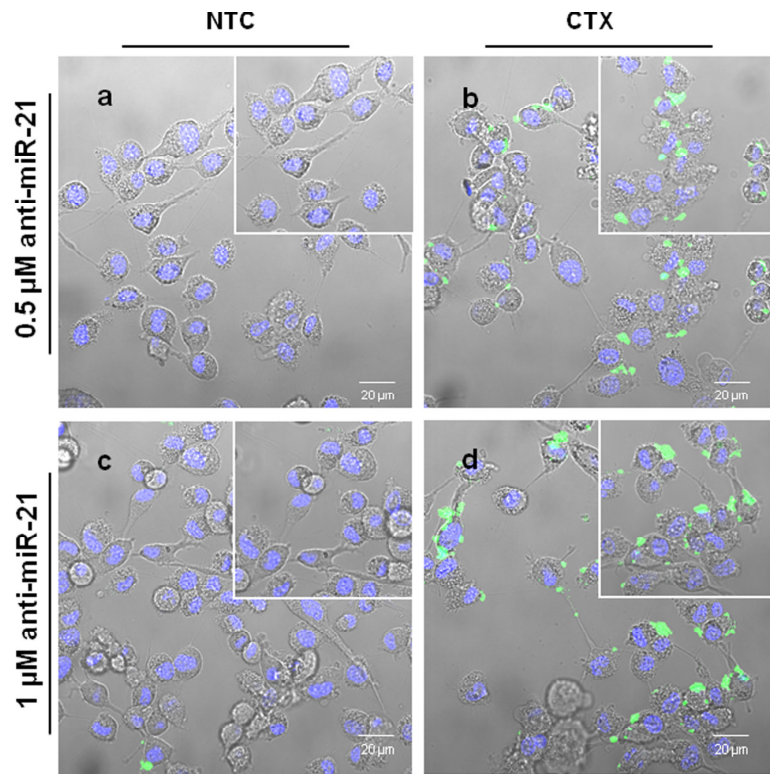

**Supplementary Figure 3. Tumor cell internalization of SNALPs three months after their preparation.** CTX-coupled (CTX) or nontargeted (NT) liposomes encapsulating FAM-labeled anti-miR-21 oligonucleotides were prepared and stored at 4°C for three months. After this storage period, U87 GBM cells incubated with the SNALPs for 4 hours (at 37°C), rinsed twice with PBS, stained with DNA-specific Hoechst 33342 (blue) and then observed by confocal microscopy. The panel shows representative images at 40× magnification of U87 cells incubated with either (a, c) NT or (b, d) CTX-coupled SNALPs at a final oligonucleotide concentration of (a, b) 0.5 or (c, d) 1 μM. Results are representative of two independent experiments. Scale corresponds to 20 μm.
