# Supplementary material for: Tumor-targeted Chlorotoxin-coupled Nanoparticles for Nucleic Acid Delivery to Glioblastoma Cells: A Promising System for Glioblastoma Treatment
Source: PubMed Central journal article supplement — Mol Ther Nucleic Acids. 2013 Jun 18;2(6):e100–. doi: 10.1038/mtna.2013.30 (PMC3696908; doi:10.1038/mtna.2013.30), 2013-06-18
Supplement: mtna201330x5.pdf [file mtna201330x5.pdf]

expression values to control untreated cells. Values are presented as means  $\pm$  standard deviation (n=3). \*\*\* p<0.001 compared to cells incubated with a similar amount of NT SNALP-formulated siRNAs. # p<0.05 compared to cells incubated with a similar amount of scrambled siRNAs. + p<0.05 compared to cells incubated with a similar amount of NT SNALP-formulated siRNAs. Scale corresponds to 20  $\mu$ m.

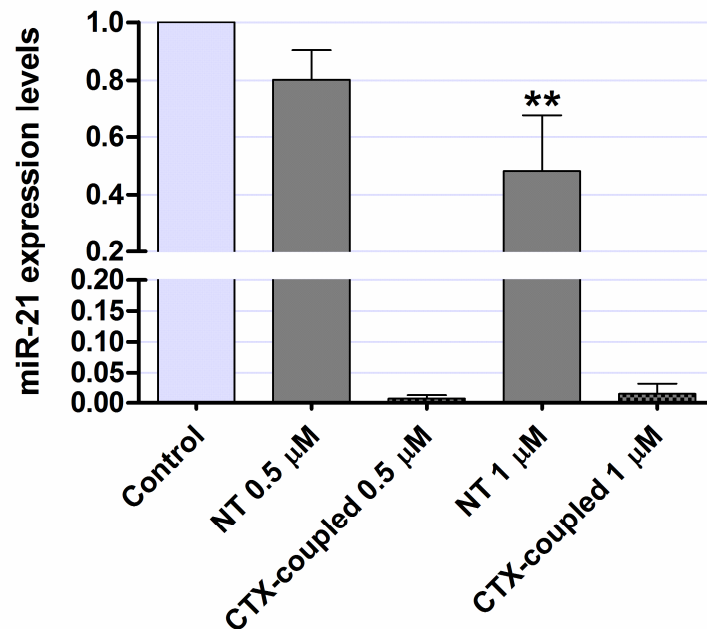

**Supplementary Figure 5. MiR-21 expression in U87 GBM cells following incubation with CTX-coupled or nontargeted liposomes encapsulating anti-miR-21 oligonucleotides.** MiR-21 expression levels in U87 cells, 48 hours after cell incubation with CTX-coupled or nontargeted (NT) liposomes encapsulating anti-miR-21 oligonucleotides (n=3). MiR-21 expression levels, normalized to the reference snord44, are presented as relative expression values to control untreated cells. Values are presented as means  $\pm$  standard deviation (n=3). \*\* p<0.01 to cells that were not exposed to liposomes.
