# Supplementary material for: Tumor-targeted Chlorotoxin-coupled Nanoparticles for Nucleic Acid Delivery to Glioblastoma Cells: A Promising System for Glioblastoma Treatment
Source: PubMed Central journal article supplement — Mol Ther Nucleic Acids. 2013 Jun 18;2(6):e100–. doi: 10.1038/mtna.2013.30 (PMC3696908; doi:10.1038/mtna.2013.30), 2013-06-18
Supplement: mtna201330x6.pdf [file mtna201330x6.pdf]

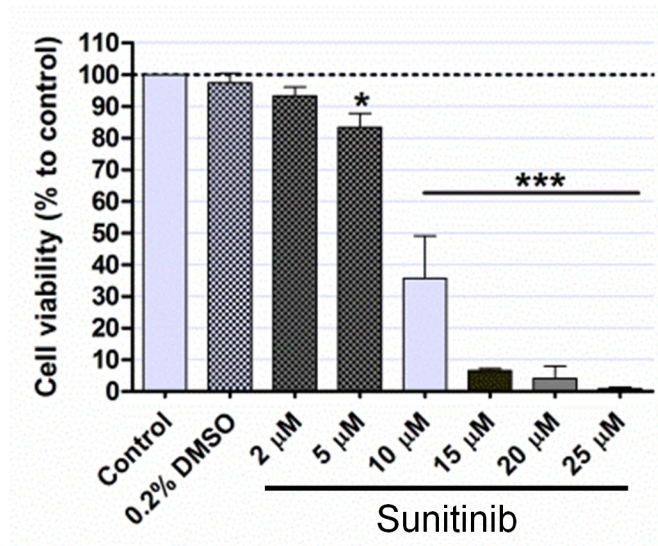

**Supplementary Figure 6. Effect of sunitinib in the viability of GL261 glioma cells.** Cell viability was evaluated by the Alamar Blue assay (as described in Materials and Methods) 24 hours after incubation with sunitinib. Values are presented as means  $\pm$  standard deviation (n=3). \* p<0.05, \*\*\* p<0.001 compared to cells exposed to cell culture medium containing 0.2% DMSO.
